# Supplementary material for: Synthesis and characterization of diblock copolymers of styrene and N-tert-butylacrylamide and gelation evidenced by rheology
Source: Royal Society of Chemistry journal article supplement (doi:10.1039/b815353a), 2009-01-01
Supplement: b815353a.pdf [file b815353a.pdf]

## Synthesis and characterization of diblock copolymers of styrene and *N*-tert-butylacrylamide and gelation evidenced by rheology

Nitin Sharma,<sup>a</sup> and Rajeswari M. Kasi, <sup>\*a,b</sup>

<sup>a</sup> Polymer Program, Institute of Materials Science

<sup>b</sup> Chemistry Department,

University of Connecticut, 97 North Eagleville Rd. Storrs CT 06269 USA

E-mail: [kasi@ims.uconn.edu](mailto:kasi@ims.uconn.edu)

**Figure S1.** GPC chromatograms of polystyrene ( $S_m$  with  $m = 46$ ) and polystyrene-*b*-poly(*N*-tert-butylacrylamide) ( $S_{46}NtBAM_n$  with  $n = 157, 197, 275, 355$ ) with THF as the eluent and calibrated using polystyrene standards.

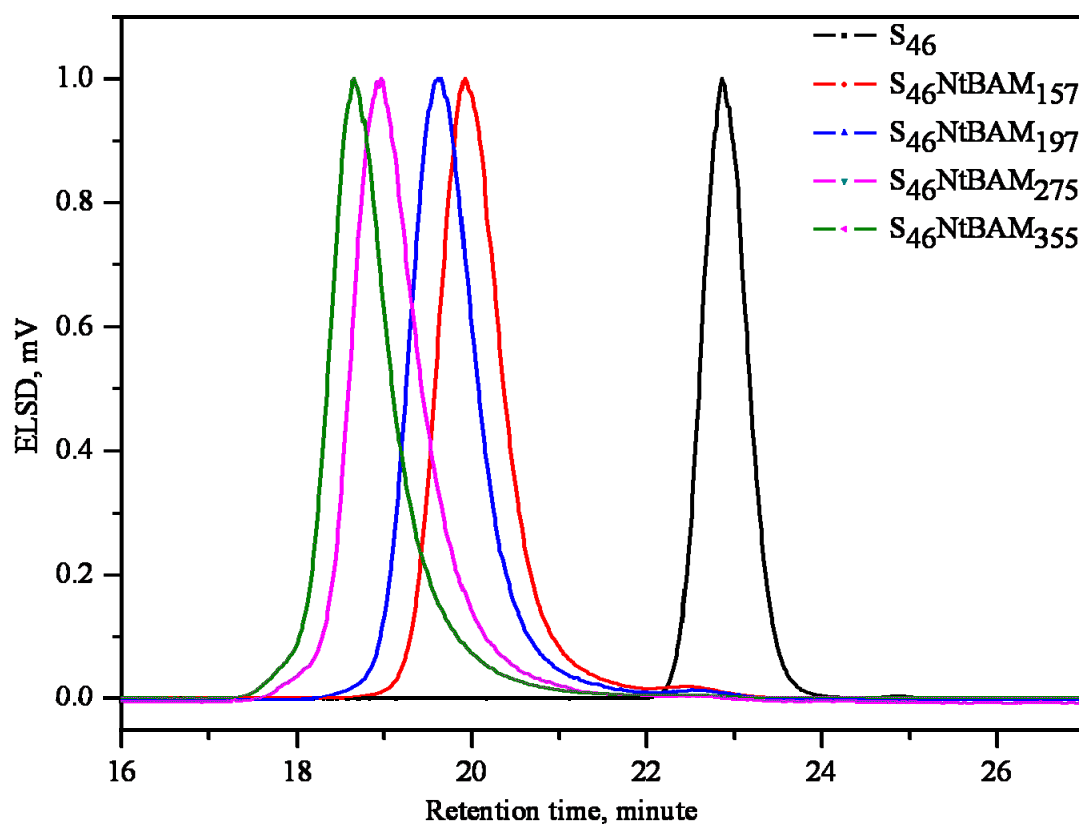

**Figure S2.** Dynamic rheological data for a system consisting of S<sub>278</sub>NtBAM<sub>517</sub>/1-octanol. Plot of G' and G''/tan(nπ/2) against concentrations of S<sub>278</sub>NtBAM<sub>517</sub> in 1-octanol at various frequencies (99.58, 31.49, 9.958, 3.14, 0.6283 and 0.3149 rad s<sup>-1</sup>).

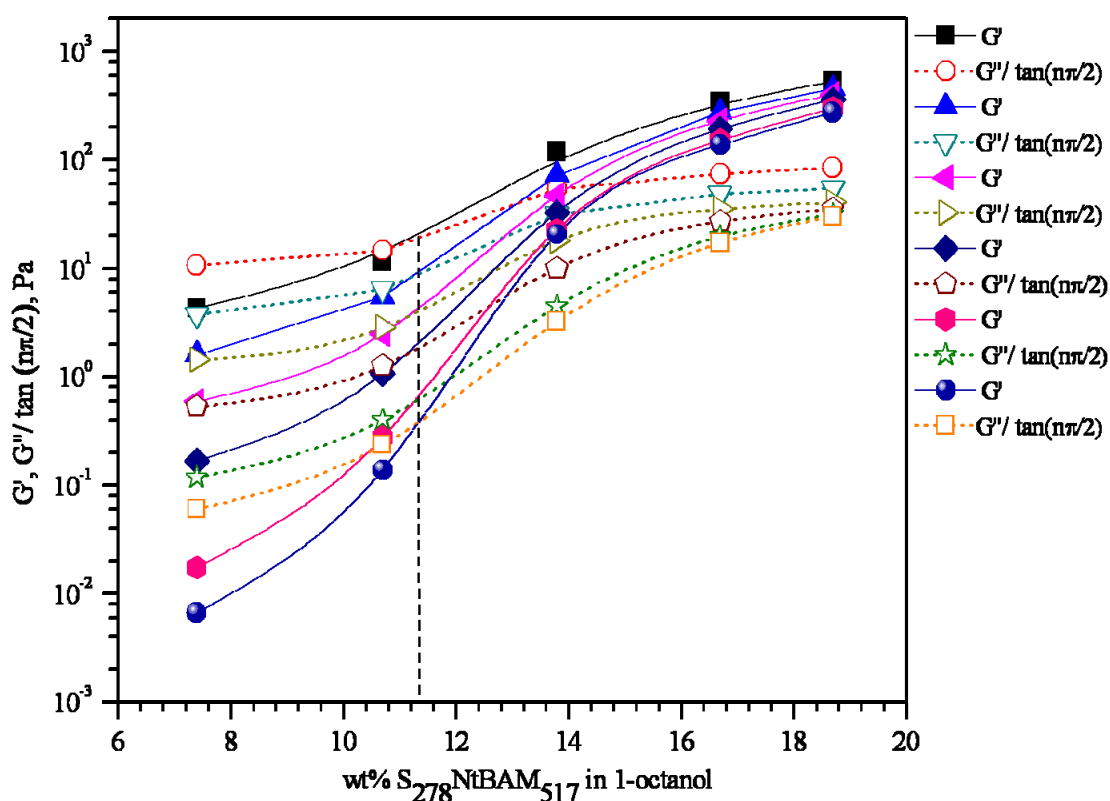

The gel-point equation is as follows:

$$G'(\omega) = \frac{G''(\omega)}{\tan(n\pi/2)} = S\Gamma(1-n)\cos(n\pi/2)\omega^n$$

The above equation suggest the existence of cross-over of  $G'(\omega)$  and  $G''(\omega)/\tan(n\pi/2)$  at the gel point which is manifested in fig. S2. We can obtain the value of  $G'(\omega)$  from the cross-over point in fig. S2, which is used to calculate front factor, S. The  $G'$  obtained for different frequencies are plotted in fig. S3 and S is determined to be  $0.55 \text{ Pa}\cdot\text{s}^{0.677}$ .

**Figure S3.** Plot of  $\log G'(\omega)$  versus  $\log \omega^{0.677}$  at critical gelation concentration ( $c_g = 11.3$  wt%) and  $T = 35$  °C of  $S_{278}NtBAM_{517}/1$ -octanol system.

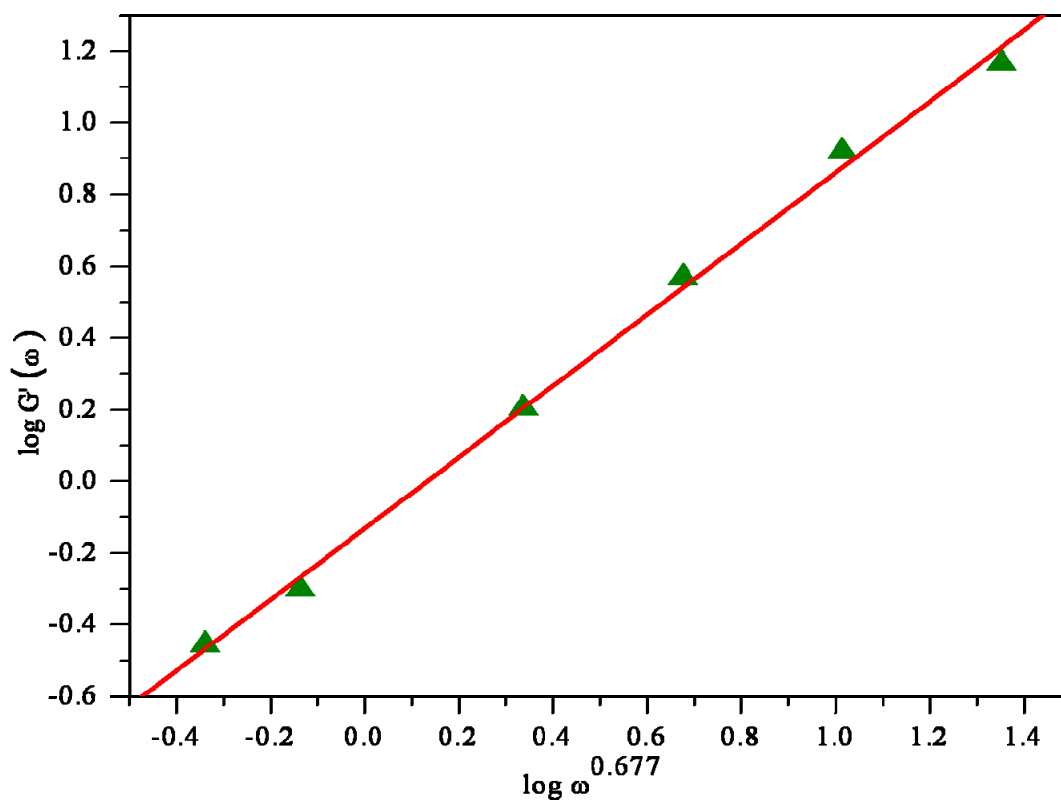

From the line of fit in fig. S3, we get the intercept =  $\log[S\Gamma(1-n)\text{Cos}(n\pi/2)] = -0.1301$ . Also we have already calculated the value of viscoelastic exponent,  $n = 0.677$  from fig. 5 in the main paper. Thus the value of  $S$  is estimated as  $0.55 \text{ Pa}\cdot\text{s}^{0.677}$ .

**Note:**  $\Gamma(1-n) = \Gamma(1-0.677) = 2.769$ .
